# Supplementary material for: Reduced plasma desmosterol-to-cholesterol ratio and longitudinal cognitive decline in Alzheimer's disease
Source: PubMed Central journal article supplement — Alzheimers Dement (Amst). 2015 Mar 29;1(1):67–74. doi: 10.1016/j.dadm.2014.11.009 (PMC4876914; doi:10.1016/j.dadm.2014.11.009), 2015-03-29

# Supplementary Fig. 1. Sato et al. (for review)

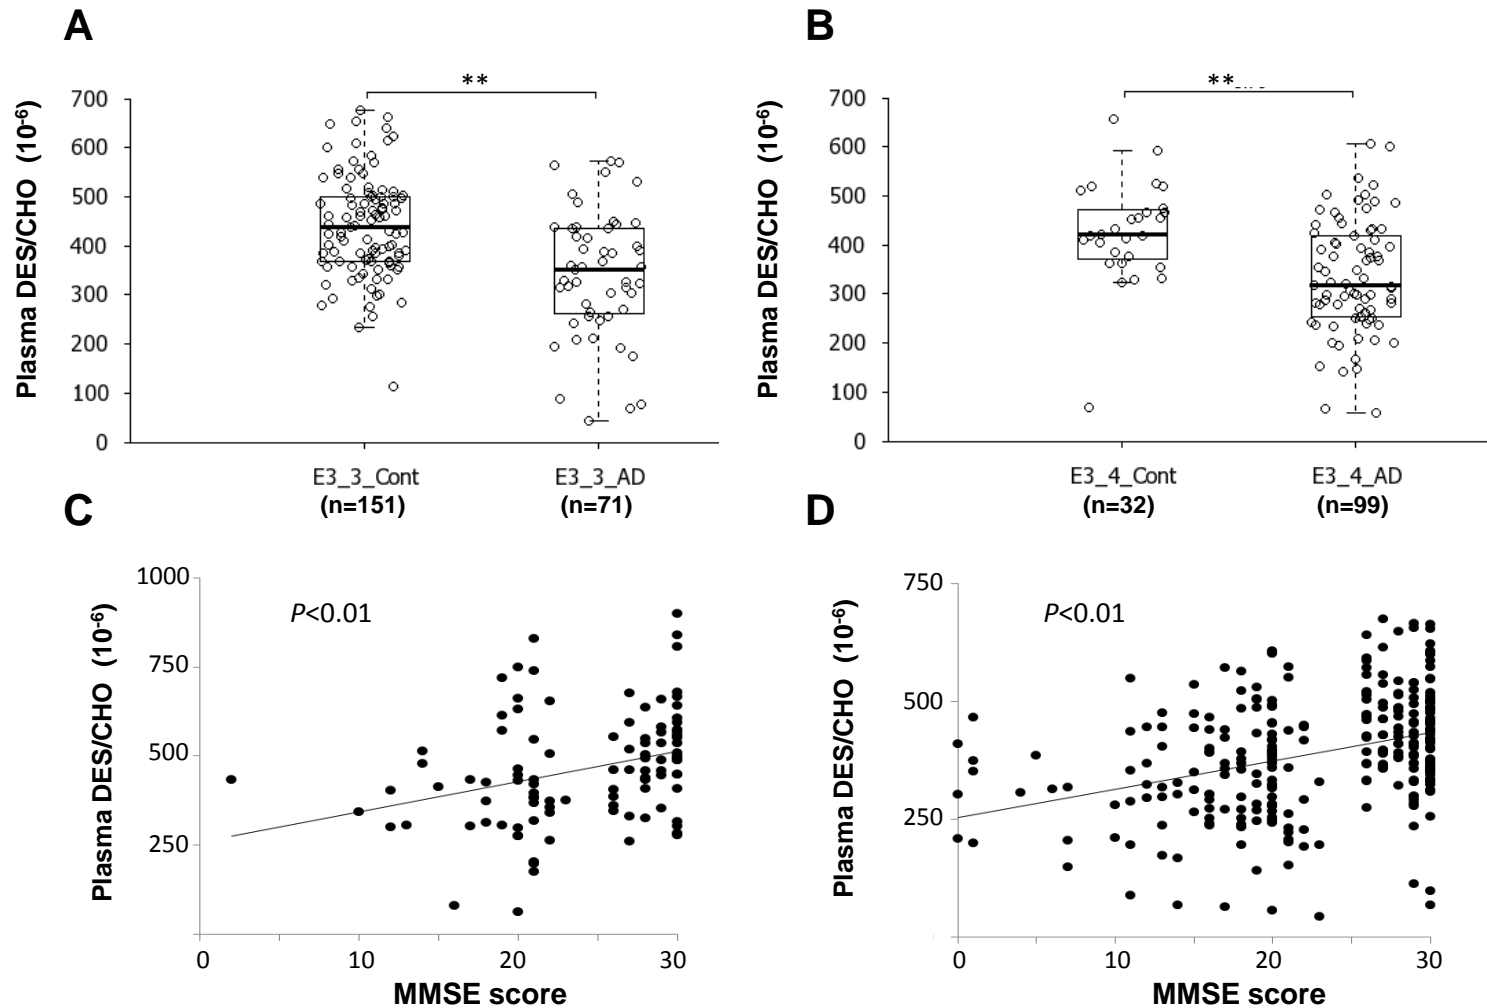

## Figure legend Supplementary Fig. 1:

- (A) Comparison of plasma DES/CHO between control subjects and AD patients with *APOE*  $\epsilon 3/3$ . \*\*,  $p < 0.01$ .  
(B) Comparison of plasma DES/CHO between control subjects and AD patients with *APOE*  $\epsilon 3/4$ . \*\*,  $p < 0.01$ .  
(C) Correlation between plasma DES/CHO and MMSE score in males (n=105).  
(D) Correlation between plasma DES/CHO and MMSE score in females (n=281).

## Supplementary Fig. 2. Sato et al. (for review)

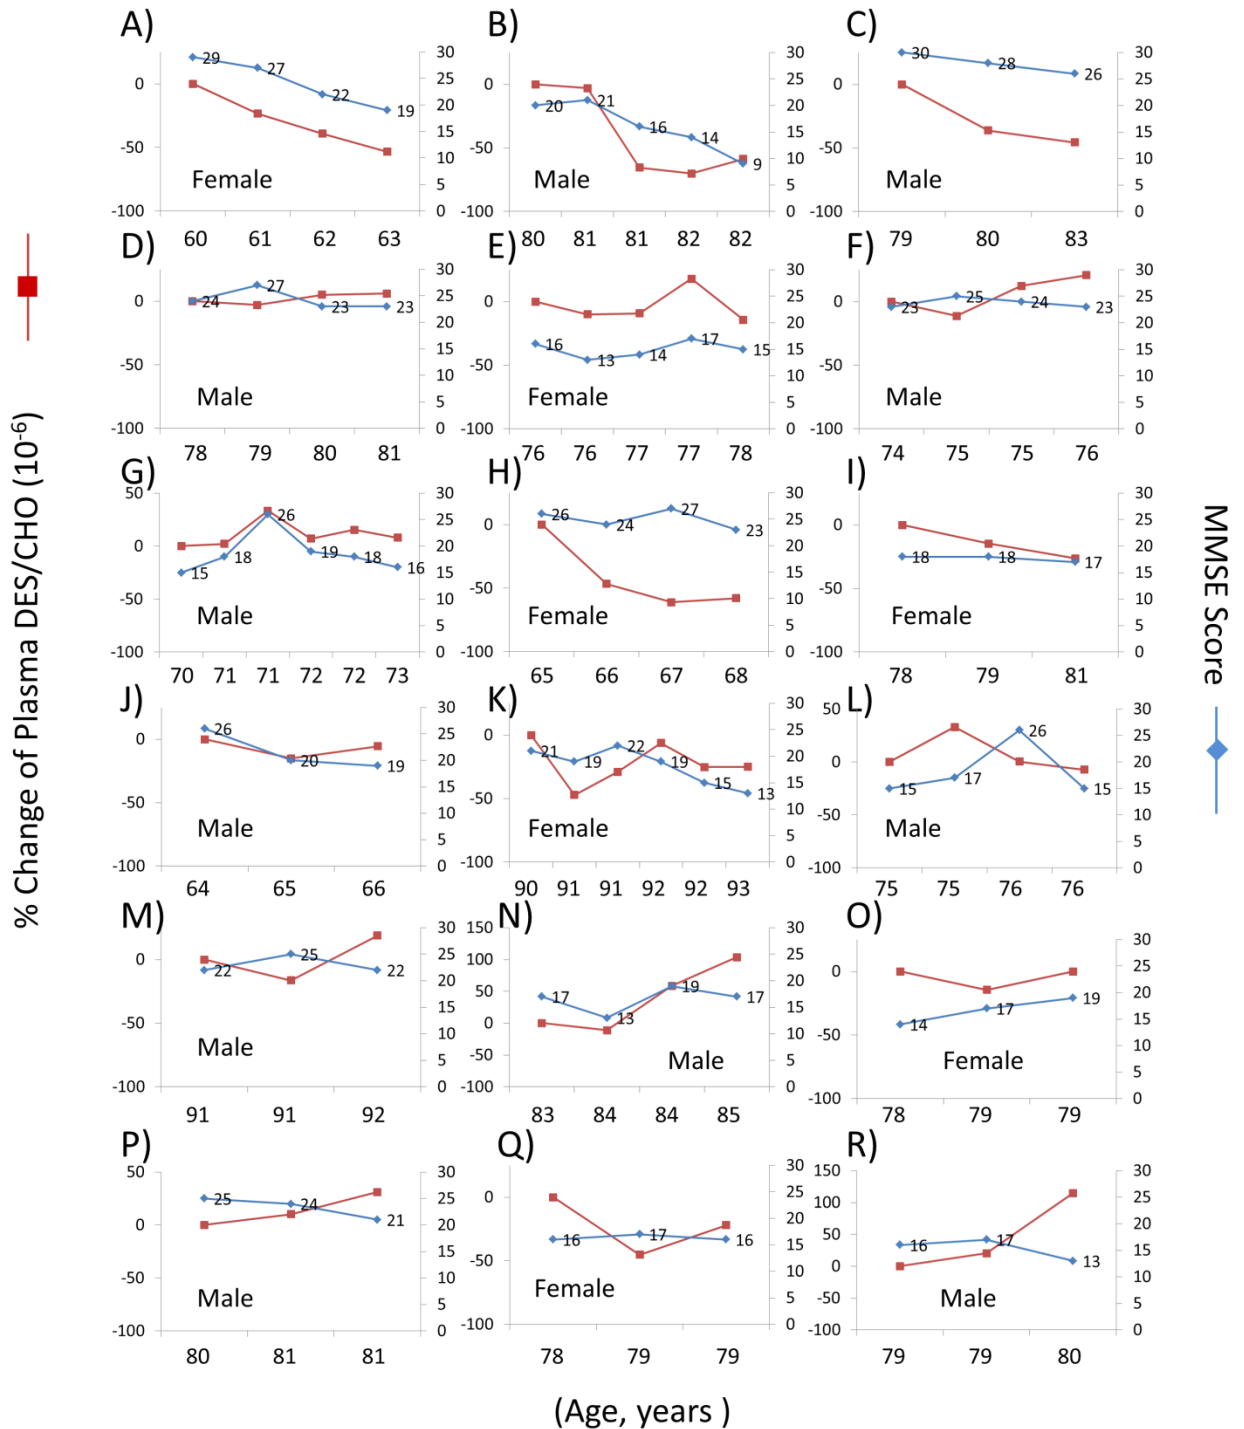

### Figure legend for Supplementary Fig. 2:

Changes in plasma DES/CHO and MMSE scores in AD patients (A-R), MCI subjects (S-X), and normal subjects (Y-IV). The longitudinal change in plasma DES/CHO (red line) was compared with the baseline value. Longitudinal MMSE scores are shown in blue.

# Supplementary Figure 2. Sato et al. (continued)

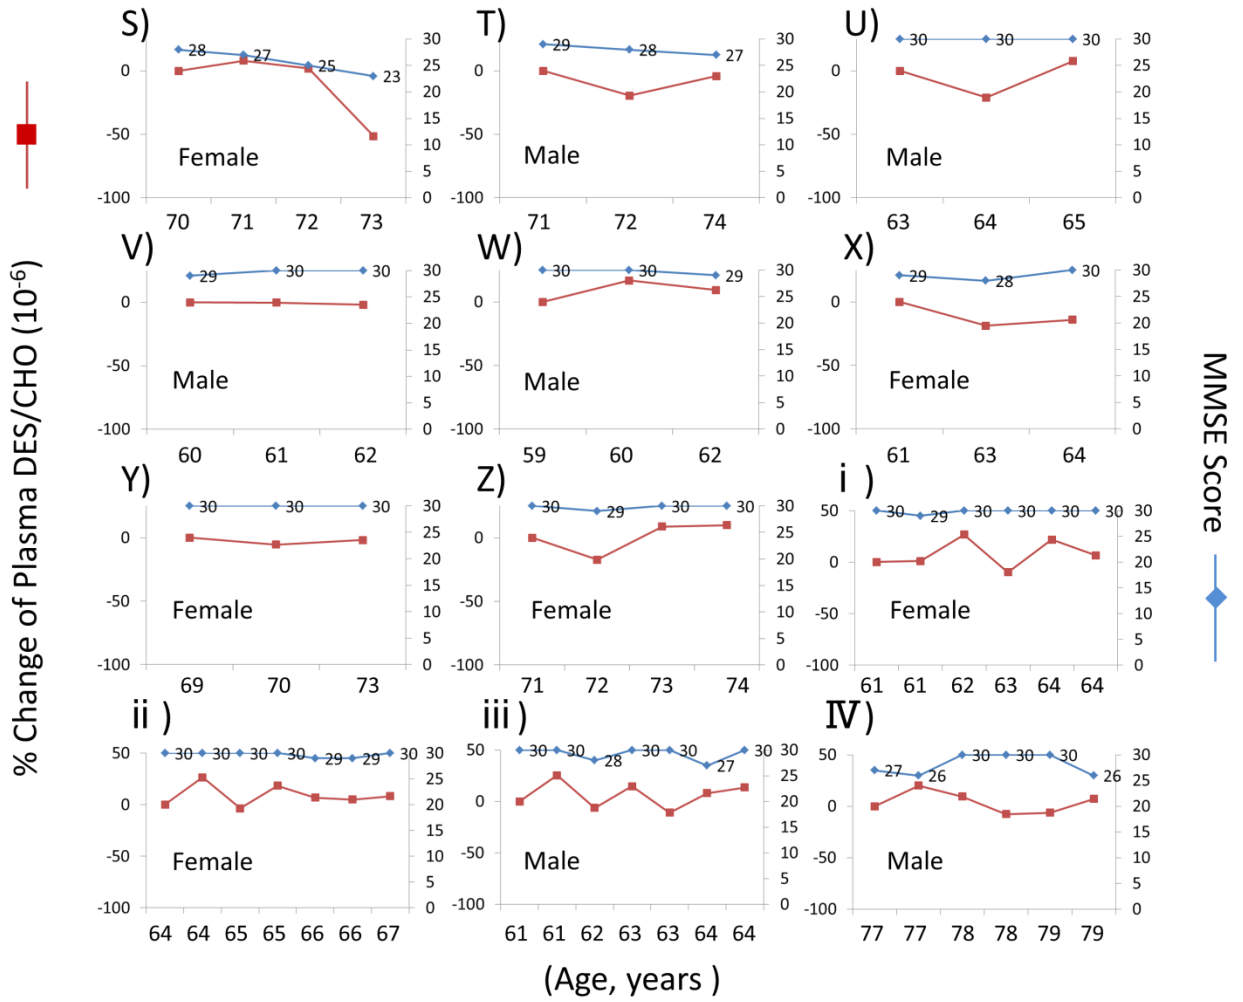

Supplement: mmc1.pdf [file mmc1.pdf]
